# Supplementary material
Source: HighWire-hosted journal article supplement (http://www.qdcxjkg.com/highwire/filestream/113718/field_highwire_adjunct_files/0/ERJ-01803-2012_Disclosures.pdf)
Supplement: ERJ-01803-2012_Disclosures.pdf [file ERJ-01803-2012_Disclosures.pdf]

In the past 5 years, **Jacques Piquet** received fees for speaking, organising education or consulting from Nycomed, AstraZeneca, Boehringer Ingelheim and GlaxoSmithKline.

In the past 5 years, **Francis Martin** received fees for speaking, organising education or consulting from Philips-Respironics, Resmed-Narval, Boehringer Ingelheim, AstraZeneca, GSK, Lilly, Chiesi, Novartis, Actelion, France-Oxygène and ADEP-assistance.

In the past 5 years, **François Blanchon** received fees for speaking, organising education or consulting from AstraZeneca and Roche.

In the past 5 years, **Nicolas Roche** received fees for speaking, organising education or consulting from Altana Pharma - Nycomed, AstraZeneca, Boehringer Ingelheim, Chiesi, GlaxoSmithKline, MEDA, Mundipharma, Novartis, Pfizer and Teva.
